# Supplementary material for: Who is wearing a mask? Gender-, age-, and location-related differences during the COVID-19 pandemic
Source: PLoS One. 2020 Oct 15;15(10):e0240785. doi: 10.1371/journal.pone.0240785 (PMC7561164; doi:10.1371/journal.pone.0240785)
Supplement: S2 File — Its contains raw data for the second data collection period in July and August. (XLSX) [file pone.0240785.s002.xlsx]

## Sheet: Urban
Date:	Time:	Mask Mandate?	Direct Distance From Post Office:(miles)	Direct Distance From Post Office: (km)	County:	Total	Women Total	Young Women w Mask	Middle Age Women w Mask	Older Women w Mask	Women w Mask	Young Women Incorrect Wearer	Middle Age Women Incorrect Wearer	Older Women Incorrect Wearer	Women Incorrect Wearer	Young Women No Mask	Middle Age Women No Mask	Older Women No Mask	Women No Mask	Men Total	Young Men w Mask	Middle Age Men w Mask	Older Men w Mask	Men w Mask	Young Men Incorrect Wearer	Middle Age Men Incorrect Wearer	Older Men Incorrect Wearer	Men Incorrect Wearer	Young Men No Mask	Middle Age Men No Mask	Older Men No Mask	Men No Mask	Total Mask	Total Incorrect Wearer	Total No Mask
2020-07-24	4-4:45 pm	Store	0.55	0.89	Milwaukee	78	39	19	6	5	30	1	2	2	5	3	1	0	4	39	13	9	10	32	0	1	2	3	2	0	2	4	62	8	8
2020-07-24	4:20-4:55 pm	Store	2.93	4.71	Milwaukee	49	28	8	10	7	25	0	0	0	0	2	1	0	3	21	5	6	7	18	0	0	0	0	2	1	0	3	43	0	6
2020-07-31	3:00-3:15pm	Store	1.01	1.63	Milwaukee	9	3	0	2	1	3	0	0	0	0	0	0	0	0	6	0	6	0	6	0	0	0	0	0	0	0	0	9	0	0
2020-07-31	3:15-4:00pm	Store	0.98	1.57	Milwaukee	51	27	0	20	4	24	0	0	0	0	0	3	0	3	24	0	19	4	23	0	0	0	0	0	0	1	1	47	0	4
2020-07-30	1:35-2:15pm	Store	1.97	3.17	Milwaukee	107	45	18	18	5	41	3	0	0	3	0	1	0	1	62	17	22	12	51	1	5	1	7	0	1	3	4	92	10	5
2020-07-24	7:20-8:00 pm	Store	0.93	1.5	Milwaukee	144	72	48	17	3	68	2	0	0	2	1	0	1	2	72	39	19	12	70	2	0	0	2	0	0	0	0	138	4	2
2020-07-24	6:30 - 7:00 pm	No	1.08	1.74	Milwaukee	83	36	16	15	1	32	1	2	0	3	0	1	0	1	47	21	18	4	43	0	2	0	2	0	2	0	2	75	5	3
2020-07-24	635-725 pm	Store	1.18	1.9	Milwaukee	214	112	78	26	6	110	0	0	0	0	2	0	0	2	102	60	30	5	95	0	0	0	0	6	1	0	7	205	0	9
2020-07-25	2:25-2:45 pm	Store	3.07	4.94	Milwaukee	106	53	19	22	2	43	4	4	1	9	0	0	1	1	53	16	25	5	46	4	0	0	4	0	3	0	3	89	13	4
2020-08-01	3:30-4:00 pm	State	2.94	4.72	Milwaukee	69	41	15	23	0	38	0	1	0	1	2	0	0	2	28	10	16	0	26	0	1	1	2	0	0	0	0	64	3	2
2020-07-25	3:30-4:00 pm	No	3.1	4.98	Milwaukee	196	98	30	43	8	81	7	6	1	14	2	1	0	3	98	24	45	4	73	5	12	0	17	6	2	0	8	154	31	11
2020-08-01	4:00-5:00pm	State	3.07	4.95	Milwaukee	271	181	117	49	2	168	9	3	0	12	0	1	0	1	90	59	19	3	81	7	2	0	9	0	0	0	0	249	21	1
2020-07-26	355-425 pm	No	3.81	6.12	Milwaukee	71	46	20	12	7	39	1	0	0	1	4	0	2	6	25	15	1	4	20	1	0	0	1	4	0	0	4	59	2	10
2020-07-28	3:05 - 3:35pm	Store	1.27	2.04	Milwaukee	43	25	11	10	2	23	0	0	0	0	2	0	0	2	18	8	6	1	15	1	1	1	3	0	0	0	0	38	3	2
2020-08-03	1040-1110 am	State	2.94	4.73	Milwaukee	117	69	39	17	13	69	0	0	0	0	0	0	0	0	48	25	13	7	45	0	0	0	0	2	1	0	3	114	0	3

## Sheet: Suburban
Date:	Time:	Mask Mandate?	Direct Distance From Post Office:(miles)	Direct Distance From Post Office: (km)	County:	Total	Women Total	Young Women w Mask	Middle Age Women w Mask	Older Women w Mask	Women w Mask	Young Women Incorrect Wearer	Middle Age Women Incorrect Wearer	Older Women Incorrect Wearer	Women Incorrect Wearer	Young Women No Mask	Middle Age Women No Mask	Older Women No Mask	Women No Mask	Men Total	Young Men w Mask	Middle Age Men w Mask	Older Men w Mask	Men w Mask	Young Men Incorrect Wearer	Middle Age Men Incorrect Wearer	Older Men Incorrect Wearer	Men Incorrect Wearer	Young Men No Mask	Middle Age Men No Mask	Older Men No Mask	Men No Mask	Total Mask	Total Incorrect Wearer	Total No Mask
2020-07-31	5.30-5:45 pm	No	9.51	15.31	Waukesha	14	3	2	1	0	3	0	0	0	0	0	0	0	0	11	3	5	1	9	0	0	0	0	0	2	0	2	12	0	2
2020-07-30	11.30 am-Noon	Store	10.71	17.24	Milwaukee	50	27	5	15	5	25	0	1	0	1	1	0	0	1	23	4	6	7	17	2	0	1	3	0	3	0	3	42	4	4
2020-07-30	12 noon-12:25	Store	10.69	17.21	Milwaukee	110	65	18	33	9	60	2	0	0	2	1	2	0	3	45	15	19	5	39	5	0	0	5	1	0	0	1	99	7	4
2020-08-01	440-540 pm	State	7.13	11.48	Milwaukee	319	200	109	63	23	195	3	1	0	4	1	0	0	1	119	54	46	14	114	1	1	0	2	2	1	0	3	309	6	4
2020-08-02	910-11 am	State	19.69	31.69	Waukesha	107	46	12	23	8	43	1	0	0	1	0	1	1	2	61	11	25	21	57	0	0	1	1	1	1	1	3	100	2	5
2020-08-03	3:15-4:15	State	19.69	31.69	Waukesha	115	59	20	33	5	58	0	1	0	1	0	0	0	0	56	16	31	9	56	0	0	0	0	0	0	0	0	114	1	0
2020-07-26	11.10-11.40am	Store	8.59	13.82	Milwaukee	154	51	24	16	11	51	0	0	0	0	0	1	0	0	103	31	39	28	98	0	2	0	2	3	0	0	3	149	2	3
2020-08-01	1.45-2.10pm	State	13.41	21.58	Waukesha	133	58	10	36	10	56	0	0	0	0	2	0	0	2	75	9	44	20	73	0	0	0	0	0	1	1	2	129	0	4
2020-07-26	1205-1230	No	8.47	13.64	Milwaukee	150	99	49	30	10	89	0	0	0	0	8	1	1	10	51	20	10	18	48	0	0	0	0	2	1	0	3	137	0	13
2020-07-31	4.00-4:30 pm	No	13.27	21.36	Waukesha	124	81	20	40	6	66	1	0	0	1	3	10	1	14	43	10	15	4	29	1	0	0	1	5	8	0	13	95	2	27
2020-07-31	5.00-5:30 pm	Store	10.95	17.62	Waukesha	91	57	11	36	9	56	0	0	0	0	0	1	0	1	34	8	20	3	31	1	1	0	2	1	0	0	1	87	2	2
2020-08-01	2.15pm-2.50pm	State	13.27	21.36	Waukesha	229	151	45	90	14	149	1	0	0	1	1	0	0	1	78	23	41	12	76	0	0	0	0	1	0	1	2	225	1	3

## Sheet: Rural
Date:	Time:	Mask Mandate?	Direct Distance From Post Office:(miles)	Direct Distance From Post Office: (km)	County:	Total	Women Total	Young Women w Mask	Middle Age Women w Mask	Older Women w Mask	Women w Mask	Young Women Incorrect Wearer	Middle Age Women Incorrect Wearer	Older Women Incorrect Wearer	Women Incorrect Wearer	Young Women No Mask	Middle Age Women No Mask	Older Women No Mask	Women No Mask	Men Total	Young Men w Mask	Middle Age Men w Mask	Older Men w Mask	Men w Mask	Young Men Incorrect Wearer	Middle Age Men Incorrect Wearer	Older Men Incorrect Wearer	Men Incorrect Wearer	Young Men No Mask	Middle Age Men No Mask	Older Men No Mask	Men No Mask	Total Mask	Total Incorrect Wearer	Total No Mask
July 30th	1:15-2:00	Store	57.14	91.96	Washington	148	92	31	55	6	92	0	0	0	0	0	0	0	0	56	21	26	9	56	0	0	0	0	0	0	0	0	148	0	0
July 31st	11:50-12:35	Store	28.75	46.27	Washington	141	74	22	42	10	74	0	0	0	0	0	0	0	0	67	18	41	8	67	0	0	0	0	0	0	0	0	141	0	0
2020-08-02	1010-11 am	State	22.9	36.85	Waukesha	214	82	33	36	9	78	0	1	0	1	0	3	0	3	132	29	55	42	126	0	0	0	0	2	3	1	6	204	1	9
July 31st	12:55-1:40	Store	27.19	43.75	Washington	56	36	9	14	5	28	0	1	0	1	2	5	0	7	20	5	5	4	14	0	0	0	0	0	4	2	6	42	1	13
August 3rd	1:25-2:40	State	22.9	36.85	Waukesha	142	57	8	39	9	56	0	1	0	1	0	0	0	0	85	16	54	10	80	0	0	0	0	2	2	1	5	136	1	5
July 27th	11:40-12:25	Store	49.62	79.85	Sheboygan	173	99	23	40	29	92	0	1	1	2	2	1	2	5	74	18	35	18	71	0	0	0	0	0	3	0	3	163	2	8
July 27th	12:30-1:15	Store	49.31	79.35	Sheboygan	45	19	2	10	6	18	0	0	0	0	0	1	0	1	26	5	14	7	26	0	0	0	0	0	0	0	0	44	0	1
July 27th	2:10-2:55	No	41.23	66.36	Sheboygan	40	24	1	1	2	4	0	0	0	0	4	9	7	20	16	1	1	2	4	0	0	0	0	2	5	5	12	8	0	32
July 28th	12:10-12:55	Store	24.06	38.73	Ozaukee	153	88	24	51	13	88	0	0	0	0	0	0	0	0	65	21	32	11	64	1	0	0	1	0	0	0	0	152	1	0
July 28th	1:20-2:05	Store	23.72	38.17	Washington	42	25	2	16	4	22	0	0	0	0	2	1	0	3	17	6	3	5	14	0	0	0	0	0	3	0	3	36	0	6
